# Supplementary material
Source: MDPI journal article supplement (https://www.mdpi.com/2077-0472/13/4/834)
Supplement: s1 [file s1]

## SUPPLEMENTARY MATERIALS

**Table S1.** Phenolic acids (PA) composition of wheat grain [ $\mu\text{g g}^{-1}$ ], mean values for interaction location x cropping systems.

| Location<br>(L)   | Cropping<br>systems<br>(CS) | FER                 | SIN                | p-COU               | CAF                | VAN                | SYR                | p-HB               | PCA                | SA                 | TPAs                 |
|-------------------|-----------------------------|---------------------|--------------------|---------------------|--------------------|--------------------|--------------------|--------------------|--------------------|--------------------|----------------------|
| Dukla             | ORG                         | 602.44 <sup>d</sup> | 43.81 <sup>b</sup> | 10.71 <sup>c</sup>  | 2.63 <sup>e</sup>  | 11.06 <sup>d</sup> | 10.93 <sup>d</sup> | 7.38 <sup>e</sup>  | 1.74 <sup>c</sup>  | 0.30 <sup>b</sup>  | 691.01 <sup>d</sup>  |
|                   |                             | ±70.30              | ±4.57              | ±2.01               | ±1.03              | ±1.57              | ±3.41              | ±0.79              | ±0.36              | ±0.06              | ±78.79               |
|                   | INT                         | 606.01 <sup>d</sup> | 37.92 <sup>a</sup> | 10.35 <sup>bc</sup> | 1.46 <sup>ab</sup> | 10.24 <sup>c</sup> | 9.01 <sup>c</sup>  | 6.75 <sup>d</sup>  | 1.62 <sup>c</sup>  | 0.26 <sup>ab</sup> | 683.61 <sup>d</sup>  |
|                   |                             | ±66.62              | ±2.66              | ±2.29               | ±0.78              | ±1.30              | ±1.93              | ±1.04              | ±0.36              | ±0.03              | ±68.79               |
|                   | CON                         | 578.92 <sup>c</sup> | 37.25 <sup>a</sup> | 10.26 <sup>bc</sup> | 1.43 <sup>a</sup>  | 9.42 <sup>b</sup>  | 7.38 <sup>a</sup>  | 5.15 <sup>c</sup>  | 1.40 <sup>b</sup>  | 0.29 <sup>b</sup>  | 651.50 <sup>bc</sup> |
|                   |                             | ±53.58              | ±4.09              | ±1.24               | ±0.52              | ±1.56              | ±0.77              | ±1.70              | ±0.46              | ±0.05              | ±53.16               |
| Nowy<br>Lubliniec | ORG                         | 585.44 <sup>c</sup> | 40.30 <sup>a</sup> | 9.33 <sup>c</sup>   | 2.17 <sup>d</sup>  | 9.75 <sup>b</sup>  | 8.89 <sup>c</sup>  | 4.63 <sup>b</sup>  | 1.33 <sup>ab</sup> | 0.26 <sup>b</sup>  | 662.09 <sup>c</sup>  |
|                   |                             | ±37.68              | ±3.59              | ±1.27               | ±0.58              | ±1.43              | ±2.22              | ±1.74              | ±0.71              | ±0.05              | ±42.05               |
|                   | INT                         | 570.37 <sup>b</sup> | 39.33 <sup>a</sup> | 9.30 <sup>bc</sup>  | 1.91 <sup>c</sup>  | 9.76 <sup>b</sup>  | 8.94 <sup>c</sup>  | 4.44 <sup>ab</sup> | 1.32 <sup>ab</sup> | 0.24 <sup>a</sup>  | 645.62 <sup>b</sup>  |
|                   |                             | ±35.35              | ±3.60              | ±1.14               | ±0.46              | ±0.64              | ±1.95              | ±1.25              | ±0.55              | ±0.05              | ±38.39               |
|                   | CON                         | 561.55 <sup>a</sup> | 37.54 <sup>a</sup> | 7.92 <sup>bc</sup>  | 1.62 <sup>b</sup>  | 8.66 <sup>a</sup>  | 8.22 <sup>b</sup>  | 4.20 <sup>a</sup>  | 1.20 <sup>a</sup>  | 0.27 <sup>b</sup>  | 631.18 <sup>a</sup>  |
|                   |                             | ±36.71              | ±3.15              | ±1.48               | ±0.37              | ±1.11              | ±2.38              | ±1.17              | ±0.60              | ±0.05              | ±40.35               |
| L x CS            |                             | ***                 | ns                 | ns                  | ***                | ***                | ***                | ***                | ns                 | ns                 | **                   |

Values are expressed as mean  $\pm$ SD. Means in a column followed by different letters show significant differences ( $p < 0.05$ ) according to the Tukey test. Significance at: \*\*\*  $p < 0.001$ ; \*\*  $p < 0.01$ ; ns – not significant

FER – ferulic acid, SIN – sinapic acid, p-COU – p-coumaric acid, CAF – caffeic acid, VAN – vanillic acid, SYR – syringic acid, p-HB – p-hydroxybenzoic acid, PCA, protocatechuic acid, SA – salicylic acid, TPAs – total content of phenolic acids

**Table S2.** Phenolic acids (PA) composition of wheat grain [ $\mu\text{g g}^{-1}$ ], mean values for interaction location x years

| Location<br>(L)   | Years<br>(Y) | FER                  | SIN                  | p-COU              | CAF                | VAN                | SYR                | p-HB              | PCA               | SA                 | TPAs                |
|-------------------|--------------|----------------------|----------------------|--------------------|--------------------|--------------------|--------------------|-------------------|-------------------|--------------------|---------------------|
| Dukla             | 2015/2016    | 588.89 <sup>c</sup>  | 38.84 <sup>a-c</sup> | 9.89 <sup>bc</sup> | 1.81 <sup>bc</sup> | 9.85 <sup>b</sup>  | 8.71 <sup>bc</sup> | 6.07 <sup>c</sup> | 1.44 <sup>b</sup> | 0.27 <sup>ab</sup> | 665.76 <sup>c</sup> |
|                   |              | ±60.29               | ±4.01                | ±1.76              | ±0.92              | 1.46               | 2.45               | 1.31              | ±0.27             | ±0.04              | ±64.13              |
|                   | 2016/2017    | 610.26 <sup>e</sup>  | 41.79 <sup>c</sup>   | 11.45 <sup>d</sup> | 2.07 <sup>d</sup>  | 11.30 <sup>b</sup> | 9.95 <sup>d</sup>  | 7.07 <sup>d</sup> | 1.90 <sup>c</sup> | 0.29 <sup>b</sup>  | 696.07 <sup>d</sup> |
|                   |              | ±72.18               | ±4.38                | ±1.64              | ±0.50              | 1.53               | ±2.75              | ±1.59             | ±0.47             | ±0.06              | ±75.58              |
|                   | 2017/2018    | 588.22 <sup>cd</sup> | 38.36 <sup>ab</sup>  | 10.00 <sup>c</sup> | 1.64 <sup>a</sup>  | 9.57 <sup>b</sup>  | 8.66 <sup>b</sup>  | 6.14 <sup>c</sup> | 1.43 <sup>b</sup> | 0.29 <sup>ab</sup> | 664.30 <sup>c</sup> |
|                   |              | ±59.44               | ±5.45                | ±1.88              | ±0.99              | ±1.31              | ±2.81              | ±1.59             | ±0.29             | ±0.05              | ±64.77              |
| Nowy<br>Lubliniec | 2015/2016    | 561.89 <sup>a</sup>  | 37.49 <sup>a</sup>   | 8.21 <sup>a</sup>  | 1.67 <sup>ab</sup> | 8.79 <sup>a</sup>  | 8.14 <sup>a</sup>  | 3.87 <sup>a</sup> | 1.10 <sup>a</sup> | 0.25 <sup>a</sup>  | 631.40 <sup>a</sup> |
|                   |              | ±37.57               | ±2.37                | ±1.39              | 0.48               | ±1.21              | ±2.06              | ±1.58             | ±0.52             | ±0.05              | ±39.32              |
|                   | 2016/2017    | 581.81 <sup>b</sup>  | 40.90 <sup>bc</sup>  | 9.49 <sup>bc</sup> | 2.14 <sup>d</sup>  | 9.79 <sup>c</sup>  | 9.00 <sup>c</sup>  | 4.79 <sup>b</sup> | 1.42 <sup>b</sup> | 0.27 <sup>ab</sup> | 659.60 <sup>c</sup> |
|                   |              | ±36.94               | ±3.48                | ±1.50              | 0.52               | ±1.14              | ±2.26              | ±1.19             | ±0.69             | ±0.05              | ±41.65              |
|                   | 2017/2018    | 573.66 <sup>c</sup>  | 38.78 <sup>c</sup>   | 8.85 <sup>ab</sup> | 1.89 <sup>c</sup>  | 9.59 <sup>b</sup>  | 8.91 <sup>bc</sup> | 4.61 <sup>b</sup> | 1.33 <sup>b</sup> | 0.26 <sup>ab</sup> | 647.88 <sup>b</sup> |
|                   |              | ±36.58               | ±3.99                | ±1.20              | 0.49               | ±1.09              | ±2.22              | ±1.29             | ±0.61             | ±0.05              | ±40.88              |
| L x Y             |              | ***                  | ns                   | ns                 | ***                | ns                 | ***                | ***               | ***               | ns                 | ***                 |

Values are expressed as mean  $\pm$ SD. Means in a column followed by different letters show significant differences ( $p < 0.05$ ) according to the Tukey test. Significance at: \*\*\*  $p < 0.001$ ; ns – not significant

FER – ferulic acid, SIN – sinapic acid, p-COU – p-coumaric acid, CAF – caffeic acid, VAN – vanillic acid, SYR – syringic acid, p-HB – p-hydroxybenzoic acid, PCA, protocatechuic acid, SA – salicylic acid, TPAs – total content of phenolic acids

**Table S3.** Phenolic acids (PA) composition of wheat grain [ $\mu\text{g g}^{-1}$ ], mean values for interaction cropping systems x years.

| Cropping systems (CS) | Years (Y) | FER                  | SIN                  | p-COU                | CAF                | VAN                | SYR                | p-HB               | PCA                | SA                 | TPAs                |
|-----------------------|-----------|----------------------|----------------------|----------------------|--------------------|--------------------|--------------------|--------------------|--------------------|--------------------|---------------------|
| ORG                   | 2015/2016 | 584.12 <sup>bc</sup> | 40.11 <sup>b-d</sup> | 8.89 <sup>a</sup>    | 2.18 <sup>d</sup>  | 9.63 <sup>b</sup>  | 9.22 <sup>de</sup> | 5.35 <sup>de</sup> | 1.22 <sup>b</sup>  | 0.26 <sup>ab</sup> | 660.98 <sup>b</sup> |
|                       |           | ±54.57               | ±4.29                | ±1.62                | ±0.86              | ±1.63              | ±2.81              | ±2.15              | ±0.44              | ±0.04              | ±61.98              |
|                       | 2016/2017 | 606.37 <sup>d</sup>  | 44.20 <sup>d</sup>   | 11.01 <sup>c</sup>   | 2.76 <sup>e</sup>  | 11.25 <sup>d</sup> | 10.56 <sup>g</sup> | 6.63 <sup>g</sup>  | 1.89 <sup>d</sup>  | 0.31 <sup>b</sup>  | 694.97 <sup>d</sup> |
|                       |           | ±61.75               | ±4.19                | ±1.66                | ±0.80              | ±1.63              | ±3.25              | ±1.95              | ±0.64              | ±0.06              | ±68.42              |
|                       | 2017/2018 | 591.34 <sup>c</sup>  | 41.86 <sup>cd</sup>  | 10.16 <sup>a-c</sup> | 2.26 <sup>d</sup>  | 10.33 <sup>c</sup> | 9.95 <sup>f</sup>  | 6.05 <sup>f</sup>  | 1.49 <sup>c</sup>  | 0.27 <sup>ab</sup> | 673.71 <sup>c</sup> |
|                       |           | ±54.75               | ±4.14                | ±1.55                | ±0.85              | ±1.28              | ±3.08              | ±1.58              | ±0.53              | ±0.06              | ±62.00              |
| INT                   | 2015/2016 | 578.30 <sup>b</sup>  | 37.36 <sup>ab</sup>  | 9.50 <sup>ab</sup>   | 1.62 <sup>ab</sup> | 9.63 <sup>b</sup>  | 8.57 <sup>bc</sup> | 5.15 <sup>bc</sup> | 1.34 <sup>b</sup>  | 0.23 <sup>a</sup>  | 651.70 <sup>b</sup> |
|                       |           | ±57.58               | ±1.77                | ±1.95                | ±0.64              | ±1.10              | ±1.84              | ±1.63              | ±0.43              | ±0.04              | ±59.92              |
|                       | 2016/2017 | 601.62 <sup>d</sup>  | 40.20 <sup>b-d</sup> | 10.64 <sup>bc</sup>  | 1.88 <sup>c</sup>  | 10.68 <sup>c</sup> | 9.51 <sup>ef</sup> | 6.02 <sup>ef</sup> | 1.64 <sup>c</sup>  | 0.27 <sup>ab</sup> | 682.46 <sup>c</sup> |
|                       |           | ±61.96               | ±3.09                | ±1.68                | ±0.64              | ±1.04              | ±2.04              | ±1.74              | ±0.58              | ±0.04              | ±63.97              |
|                       | 2017/2018 | 584.65 <sup>bc</sup> | 38.32 <sup>a-c</sup> | 9.34 <sup>ab</sup>   | 1.57 <sup>ab</sup> | 9.68 <sup>b</sup>  | 8.84 <sup>cd</sup> | 5.61 <sup>cd</sup> | 1.44 <sup>bc</sup> | 0.25 <sup>a</sup>  | 659.67 <sup>b</sup> |
|                       |           | ±48.58               | ±3.92                | ±1.82                | ±0.74              | ±0.62              | ±1.89              | ±1.53              | ±0.41              | ±0.04              | ±50.35              |
| CON                   | 2015/2016 | 563.75 <sup>a</sup>  | 37.01 <sup>ab</sup>  | 8.76 <sup>a</sup>    | 1.43 <sup>a</sup>  | 8.70 <sup>a</sup>  | 7.48 <sup>a</sup>  | 4.40 <sup>a</sup>  | 1.25 <sup>a</sup>  | 0.28 <sup>ab</sup> | 633.06 <sup>a</sup> |
|                       |           | ±43.16               | ±2.70                | ±1.81                | ±0.43              | ±1.41              | ±1.78              | ±1.62              | ±0.49              | ±0.05              | ±42.87              |
|                       | 2016/2017 | 580.11 <sup>b</sup>  | 39.63 <sup>a-c</sup> | 9.75 <sup>a-c</sup>  | 1.68 <sup>bc</sup> | 9.70 <sup>b</sup>  | 8.35 <sup>b</sup>  | 5.14 <sup>b</sup>  | 1.44 <sup>b</sup>  | 0.26 <sup>ab</sup> | 656.07 <sup>b</sup> |
|                       |           | ±52.37               | ±2.89                | ±2.06                | ±0.45              | ±1.55              | ±1.72              | ±1.50              | ±0.65              | ±0.06              | ±54.43              |
|                       | 2017/2018 | 566.85 <sup>a</sup>  | 35.54 <sup>a</sup>   | 8.76 <sup>a</sup>    | 1.46 <sup>a</sup>  | 8.73 <sup>a</sup>  | 7.56 <sup>a</sup>  | 4.48 <sup>a</sup>  | 1.21 <sup>a</sup>  | 0.31 <sup>b</sup>  | 634.89 <sup>a</sup> |
|                       |           | ±44.66               | ±4.04                | ±1.41                | ±0.48              | ±1.02              | ±1.91              | ±1.46              | ±0.47              | ±0.05              | ±45.43              |
| CS x Y                |           | **                   | ns                   | ns                   | **                 | *                  | *                  | *                  | ns                 | ns                 | *                   |

Values are expressed as mean  $\pm$ SD. Means in a column followed by different letters show significant differences ( $p < 0.05$ ) according to the Tukey test. Significance at: \*\*  $p < 0.01$ ; \*  $p < 0.05$ ; ns – not significant

FER – ferulic acid, SIN – sinapic acid, p-COU – p-coumaric acid, CAF – caffeic acid, VAN – vanillic acid, SYR – syringic acid, p-HB – p-hydroxybenzoic acid, PCA, protocatechuic acid, SA – salicylic acid, TPAs – total content of phenolic acids
